# Supplementary figures and images for: Effect of a Freezing-thawing Cycle on Overall and Inter-variability of Runoff and Soil Loss Components for a Loess Soil
Source: Research Square preprint supplement (doi:10.21203/rs.3.rs-136442/v1), 2021-01-04

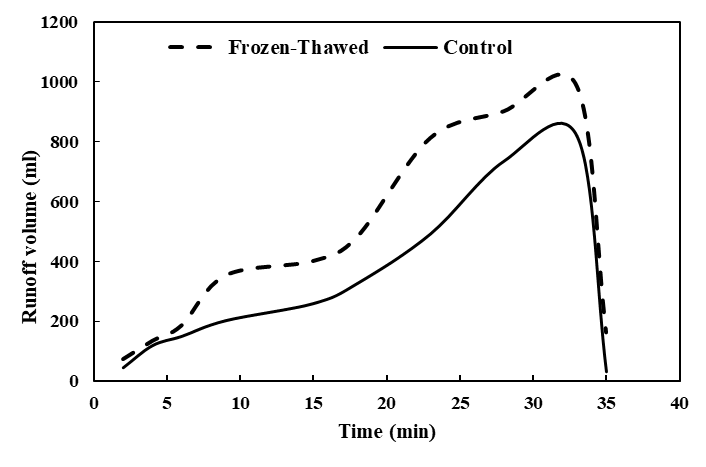

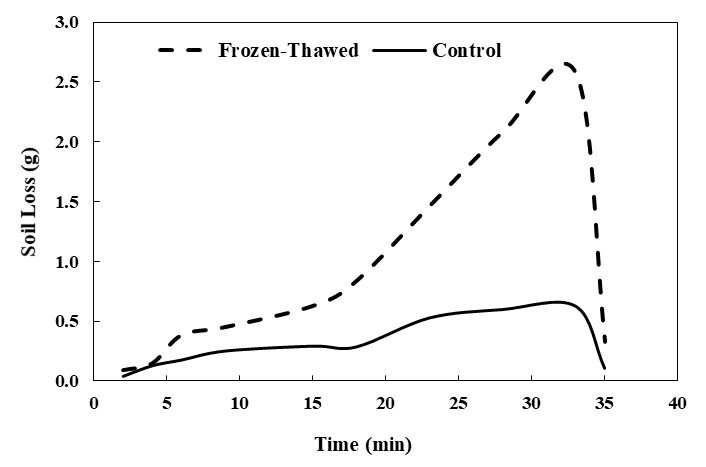

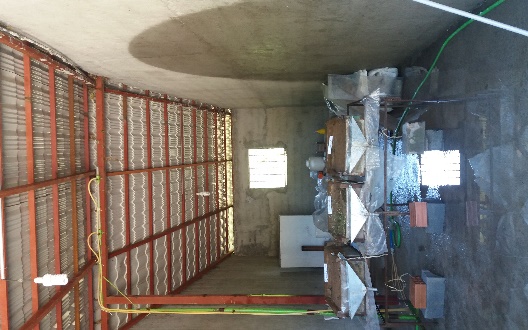

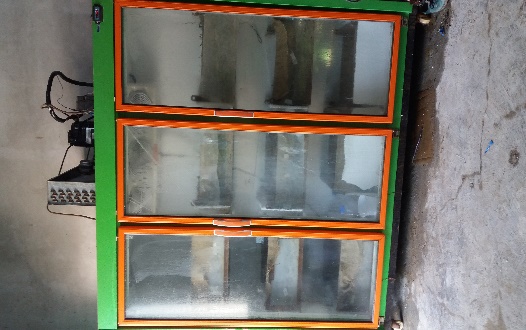

Supplement: Supplementary file 1 [file e37f8ada6335f0473562db27.docx]
